# Supplementary material for: Parasite hybridization promotes spreading of endosymbiotic viruses
Source: PubMed Central journal article supplement — bioRxiv. 2023 Mar 25:2023.03.24.534103. Preprint. [Version 1] doi: 10.1101/2023.03.24.534103 (PMC10055345; doi:10.1101/2023.03.24.534103), 2023-03-25
Supplement: NIHPP2023.03.24.534103v1-supplement-2.pdf [file NIHPP2023.03.24.534103v1-supplement-2.pdf]

## 1 **Supplementary Information for**

2

3

## 4 **Parasite hybridization promotes spreading of endosymbiotic viruses**

5 Senne Heeren, Ilse Maes, Mandy Sanders, Lon-Fye Lye, Jorge Arevalo, Alejandro Llanos-  
6 Cuentas, Lineth Garcia, Philippe Lemey, Stephen M Beverley, James A Cotton, Jean-Claude  
7 Dujardin, Frederik Van den Broeck

8

9 **Frederik Van den Broeck: [fvandenbroeck@gmail.com](mailto:fvandenbroeck@gmail.com), 0032 3 247 67 94**

10 **Jean-Claude Dujardin: [jcdujardin@itg.be](mailto:jcdujardin@itg.be), 0032 3 247 63 58**

11

12

13

## 14 **SUPPLEMENTARY METHODS**

15

### 16 **Landscape genomic analyses of *Leishmania braziliensis* (*Lb*) parasites**

17 To investigate the spatio-environmental impact on genetic variation among the three *Lb*  
18 populations, we extracted the 19 bioclimatic variables of the WorldClim2 database <sup>1</sup>. All 19  
19 variables were extracted per locality from 1 km spatial resolution raster maps after all layers  
20 were transformed to the same extent, resolution, and coordinate reference system (WGS  
21 1984). Geographic distances among sampling points were calculated as great-circle distances  
22 using geodist R-package (measure= 'haversine' <sup>2</sup>).

23 The impact of geographic distance on the genetic differentiation of *Lb* populations was  
24 assessed through Mantel tests between i) interdeme geographic distance and the Weir-  
25 Cockerham's  $F_{ST}$ <sup>3</sup>; ii) the geographic distance and Bray-Curtis genetic dissimilarity among  
26 individuals. The environmental and geographic influence on the ancestral genomic population  
27 structure of *Lb* was disentangled through redundancy analysis (RDA) and generalized  
28 dissimilarity modeling (GDM) including geographic distance and a selection of bioclimatic  
29 variables to reduce model overfitting and multicollinearity. Variable selection was performed  
30 adopting two approaches: i) mod-A: an RDA-based forward selection procedure using  
31 'ordiR2step' function of the vegan R-package <sup>4,5</sup>; ii) mod-M: a manual variable selection  
32 procedure, selecting variables if their added contribution increased the adjusted R-squared  
33 and if both the overall RDA model and individual variable were significant (p-val < 0.05).

34 Variation partitioning through RDA analysis was performed on Hellinger transformed SNP  
35 data, longitude, latitude and standardized environmental variables, using the 'decostand' and  
36 'rda' functions from the 'vegan' R-package<sup>4</sup>, to disentangle the influence of geography  
37 (isolation-by-distance) and climate (Isolation-by-environment). Finally, the different variance  
38 components were compared based on their adjusted R-squared and each explanatory

39 component was tested for significance using the `vegan::anova.cca` function. In addition to  
40 RDA variation partitioning, we constructed generalized dissimilarity models (GDMs) using the  
41 `gdm` R-package<sup>6</sup>, to investigate spatio-environmental patterns of the *Lb* genetic variability in  
42 a non-linear way<sup>6,7</sup>. The GDMs constituted a genetic distance matrix (Bray-Curtis dissimilarity  
43 of Hellinger transformed SNP genotypes) as response variable and the bioclimatic variables  
44 (as selected by the mod-A and mod-M variable selection procedures) as explanatory variables.  
45 We accounted for geographic distance effects on the genomic variability by fitting two GDMs  
46 per variable selection approach including and excluding the inter-individual geographic  
47 distance matrix. Relative variable importance in each GDM was estimated based on the I-  
48 spline basis function (i.e., the maximum height of the response curves) along with uncertainty  
49 assessment by performing 1000 iterations of each GDM model<sup>8</sup>.

50         Based on the most important environmental variables influencing the *Lb* population  
51 genomic structure, we attempted to estimate and map patches of suitable habitat for *Lb*  
52 within our study region based on present-day<sup>1</sup>, LGM<sup>9,10</sup> and LIG<sup>10,11</sup> bioclimatic data.  
53 Ecological niche models (ENMs) were constructed using Maxent, as implemented in the `dismo`  
54 R-package<sup>12,13</sup> for both environmental variable selection methods with the following  
55 parameters: linear, quadratic, product, threshold, hinge, 10 cross-validation replications and  
56 regularization multiplier (rm) set to 1, 1.5 and 2. Habitat suitability maps were constructed by  
57 averaging the predictions from all 10 replicates on present-day, LGM or LIG environmental  
58 data. A jackknife procedure was included to measure relative variable contribution and  
59 importance.

60  
61

## 62 **SUPPLEMENTARY RESULTS**

63

### 64 **Landscape genomics of *Lb* parasites**

65         Upon the strong signatures of geographical isolation of the three ancestral *Lb*  
66 components (Fig 2A) and the lack of association between the inter-population (great-circle)  
67 geographic distance and the Weir & Cockerham's  $F_{ST}$  (Supp Fig. 18; Supp Table 13), we  
68 investigated the differential influence of geography and environmental variables on the *Lb*  
69 population structure in the region. When addressing the inter-individual association of  
70 geographic distance with genetic distance (Bray-Curtis dissimilarity of SNP genotypes) we  
71 picked up a pattern resembling case-IV isolation-by-distance (i.e., increasing genetic distance  
72 with geographic distance up to a certain point after which the relationship weakens down;  
73 Supp. Fig. 19; Supp. Table 14). This revealed that isolation-by-distance mainly plays a role  
74 within populations over distances up to ca. 500km, while IBD diminishes on an inter-  
75 population level when geographic distances become too great (> 500km).

76         To investigate what other factors besides geography influenced the population  
77 divergence among the *Lb* populations, we investigated the potential impact of the abiotic  
78 environment through RDA-based variation partitioning and GDM analysis including

79 geographic distance and 19 bioclimatic variables (Supp. Table 6). Two variable selection  
80 approaches were adopted to reduce model overfitting and multicollinearity among  
81 bioclimatic variables (Supp. methods). The mod-A variable selection initially resulted in six  
82 variables, although they revealed large variance inflation factors (vif) which prompted us to  
83 remove variables with a vif > 10 in a stepwise manner, retaining only two variables:  
84 'isothermality' (bio3) and 'Precipitation of the driest month' (bio14). In contrast, the mod-M  
85 approach resulted in a final selection of five variables, each with vif < 10: 'isothermality' (bio3),  
86 'Precipitation of the driest month' (bio14), 'precipitation of warmest quarter' (bio18),  
87 'precipitation seasonality' (bio15), 'Annual mean diurnal range' (bio2). (Supp. Table 7).

88 Variation partitioning of the automated variable selection model revealed that about  
89 one-third (27.3%) of the total genomic variability could be explained by the environment  
90 (bio3, bio14) and geography together, of which both components contributed 10.2% and  
91 7.5%, respectively (Supp. Fig 8A; Supp. Table 8). In addition, the remaining 9.6% of the  
92 explained genomic variability indicates a strong confounding effect among the environment  
93 and geography components with the RDA model, meaning that about one-third of the  
94 explainable genomic variation cannot be attributed to one specific explanatory component  
95 (Supp. Table 8). In parallel, generalized dissimilarity models (GDM), including the same  
96 variables, revealed similar patterns in explaining the genomic variability by the environment  
97 (bio3, bio14) relative to geography (Supp. Fig 20). Here, GDMs could explain 55.86%  
98 (excluding geography) to 65.38% (including geography) of the genomic deviance (null  
99 deviance).

100 In contrast, variation partitioning of the RDA-model based on the manual variable  
101 selection approach (bio2, bio3, bio14, bio15, bio18) revealed a stronger environmental  
102 contribution in explaining the genomic variation in *Lb*. From the full RDA-model, explaining  
103 34.9% of the total genomic variability, about 51% could be explained by the entire  
104 environmental component whereas only 5.4% could be explained by geography (Supp. Fig 8B;  
105 Supp. Table 8). Additional GDM, explaining 59.98% (excluding geography) to 65.04%  
106 (including geography) of the genomic deviance, gave consistently similar results to the RDA  
107 model (Supp. Fig 20).

108 In accordance with the different variation partitioning models (RDA and GDM),  
109 revealing the key role in explaining the *Lb* population divergence, present-day habitat  
110 suitability predictions showed that regions of suitable (abiotic) habitat for *Lb* coincided with  
111 tropical rainforests, as predicted by the Koppen-Geiger climate classification, where the three  
112 ancestral *Lb* populations were surrounded by less suitable tropical monsoon forests (Fig 2B,C).  
113 Additional suitability predictions using Last Glacial Maximum (LGM) and Last Interglacial (LIG)  
114 periods revealed similar regions of suitable habitat, suggesting the suitable regions for  
115 ancestral *Lb* populations have been relatively stable over the past 120,000 years (Supp. Fig 9,  
116 10).

117

118

## 119 **Quality assessment of the LRV1 genome assemblies**

120 The LRV1 genomes included in this study were generated through dsRNA extraction  
121 from 31 LRV1-positive *L. braziliensis* isolates that were re-cultured following total RNA  
122 sequencing, *de novo* assembly and LRV1 contig extraction by a local BLAST search (see  
123 methods). This procedure failed for two *Lb* isolates, either due to difficulties during culturing  
124 (PER096) or because the assembly yielded a partial LRV1 genome (PER231). Two *Lb* isolates  
125 (CUM65 and LC2321) each harbored two LRV1 genomes, differing at 999 (for CUM65) and 60  
126 (for LC2321) nucleotides, bringing the total to 31 viral genomes. The assembly quality of the  
127 genomes was examined by investigating the coverage of mapped (paired) reads, SNP counts  
128 after mapping, comparison with analogous genomic regions to ~1kb sequences obtained  
129 through conventional Sanger sequencing and by read-based computational assembly  
130 improvement using Pilon <sup>14</sup>.

131 From the average 0.04% of reads that mapped against their respective LRV1 contig  
132 (Supp. Table 9), an average of 85.7% (81.3% - 91.5%) of the reads were properly paired (i.e.,  
133 correctly oriented reads with respect to each other and with proper insert sizes). In addition,  
134 most LRV1 strains contained few SNPs (zero to three) of which all were heterozygous except  
135 one. PER130 showed one homozygous SNP, which was located at the 5' end (position 6) of  
136 the assembled genome which was trimmed off in downstream analyses. However, in LRV-Lb-  
137 LC2321 we encountered 51 heterozygous SNPs (data not shown), suggesting the possibility of  
138 a mixed viral infection (i.e. two LRV1 strains present in one parasite isolate of which one is  
139 much lower in abundance than the other). To examine this in more detail, we extracted the  
140 reads mapping to the potential chimeric LRV1 genome and re-assembled the reads using a  
141 recently developed strain-resolving *de novo* assembler <sup>15</sup>, developed to extract various viral  
142 strains from mixed infection samples. This resulted in two LRV1 contigs: LC2321.1 (5,260bp)  
143 and LC2321.2 (4,738bp), and considerably dropped the number of heterozygous SNPs found  
144 in both strains. LC2321.1 showed nine heterozygous SNP of which eight were located on a  
145 non-resolved part of the LC2321.2 genome. LC2321.2 on the other hand did not reveal any  
146 SNPs. Furthermore, the remaining quality statistics of both strain resolved genomes from  
147 LC2321 were similar to the other assemblies (Supp. Table 9).

148 The sequence identity of the assembled genomes was assessed by comparison with  
149 analogous ~1kb (1197bp) sequences obtained through conventional Sanger Sequencing. This  
150 revealed for 83.8% (26/31) of the genomes a sequence identity of 100% (Supp. Table 9). The  
151 remaining five genomes encompassed both genomes of CUM65 and LC2321 (mixed LRV1  
152 infections) and PER212. For CUM65, we observed a sequence identity of 99% (12 mismatches)  
153 and 86% (152 mismatches) for LRV1-Lb-CUM65.1 and LRV1-Lb-CUM65.2, respectively. For  
154 LC2321, both resolved strains showed a sequence identity of 99% with three and ten  
155 nucleotide mismatches in LRV1-Lb-LC2321.1 and LRV1-Lb-LC2321.2, respectively. These  
156 mismatches were unique to each strain, which might indicate the Sanger sequence is a  
157 chimera of both strains. Finally, the 99% identity of PER212 with its respective partial Sanger

158 sequence showed only one nucleotide mismatch, not corresponding to the identified  
159 heterozygous SNP, suggesting a badly called base during the Sanger sequencing.

160

161

162

163

164

165 SUPPLEMENTARY FIGURES

166

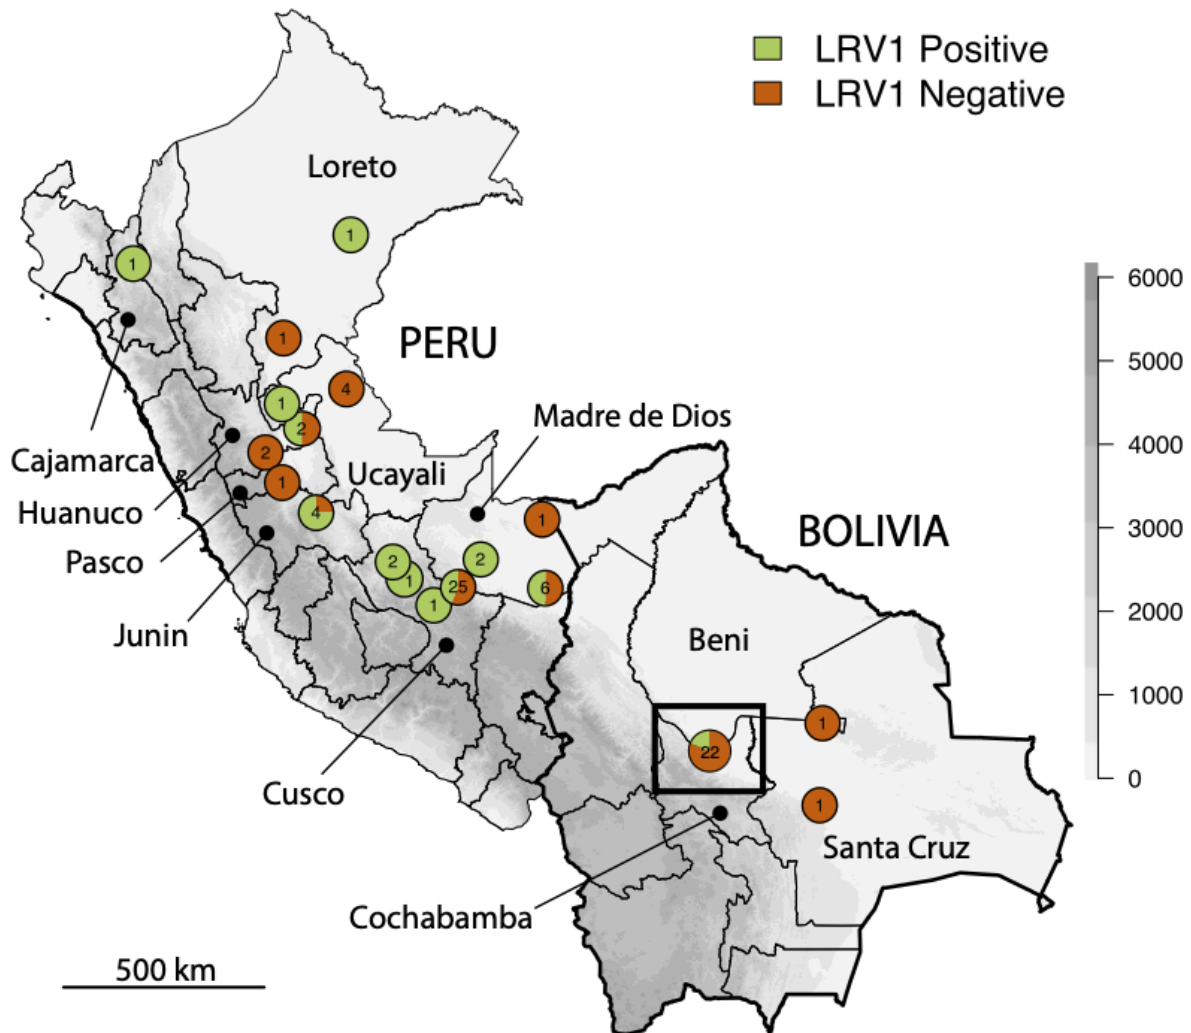

167

168 **Supplementary Figure 1.** Geographic origin of 79 *Lb* isolates from Peru and Bolivia that were  
169 included in this study. Rectangular box indicates the location of the Isiboro National Park that  
170 extends between the Departments of Cochabamba and Beni. Gray-scale represents altitude  
171 in meters.

172

173

174

175

176

177

178

179

180

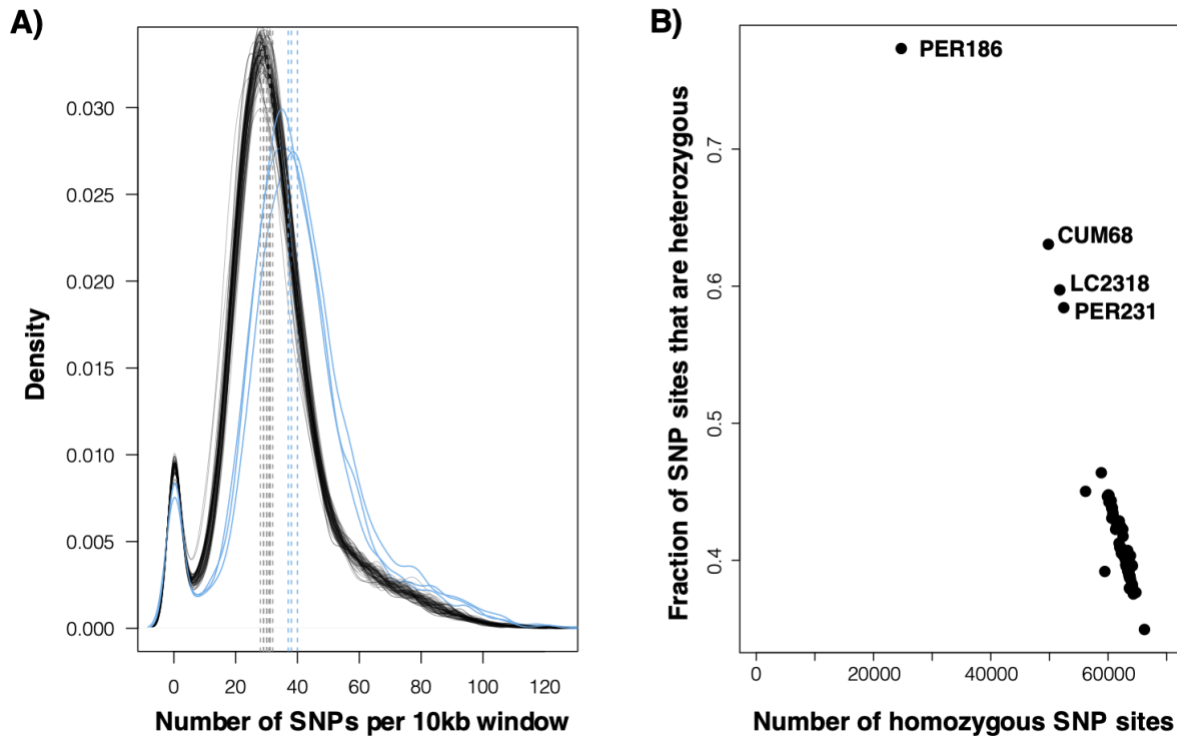

181  
182  
183  
184  
185  
186  
187  
188  
189  
190  
191  
192

**Supplementary Figure 2. A)** Kernel density plots of the number of SNPs per 10kb window for each of the 79 *Lb* genomes. The median number of SNPs per 10kb window is indicated with gray vertical dashed lines and ranges between 28 and 32 SNPs for the majority of isolates. Three isolates showed slightly larger SNP densities (indicated with blue lines in the plot): 37 SNPs in PER231, 38 SNPs in LC2318 and 40 SNPs in CUM68. **B)** Fraction of SNP sites that are heterozygous versus the number of homozygous SNP sites in each of the 79 *Lb* genomes.

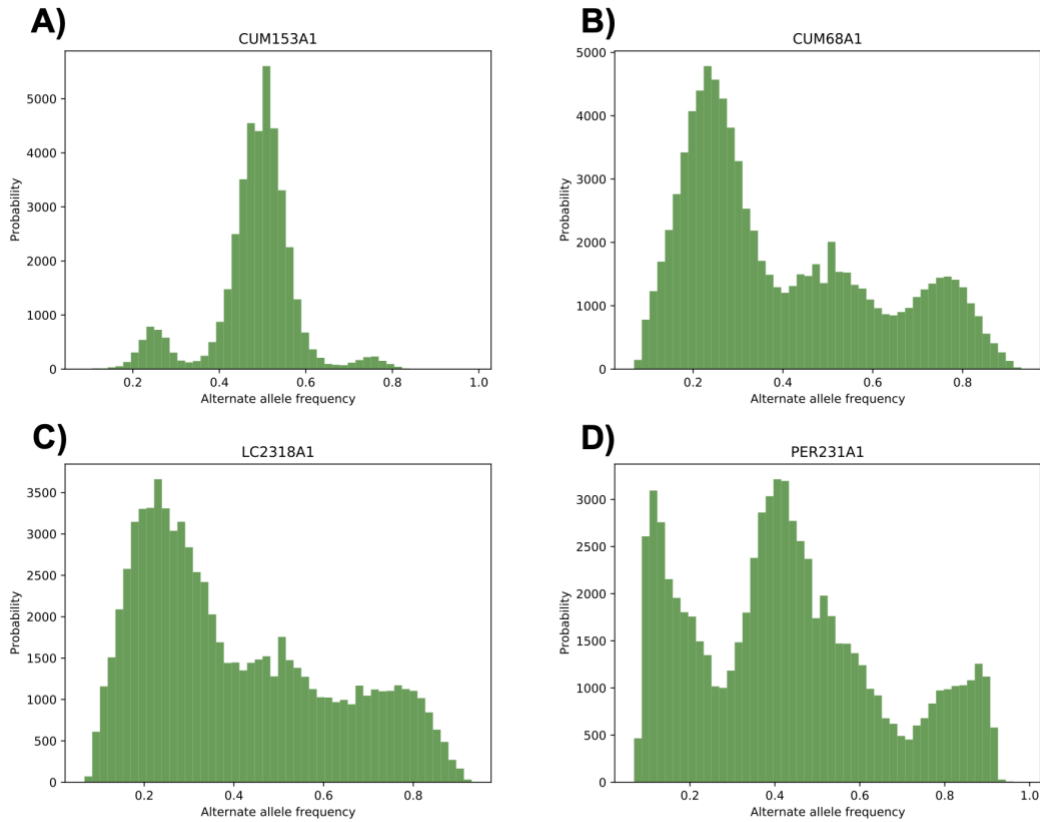

193

194

195 **Supplementary Figure 3.** Genome-wide distribution of alternate allele read depth

196 frequencies at heterozygous sites. **(A)** Example of a largely diploid individual (CUM153) with

197 allele frequencies centered around 0.5, which was observed for 77/79 *Lb* genomes included

198 in this study. **(B-C)** Two isolates (CUM68 and LC2318) were symptomatic of tetraploidy, with

199 modes of allele frequencies equal to 0.25, 0.5 and 0.75. **(C)** One isolate (PER231) showed a

200 skewed distribution, suggesting that it may be the result of a mixed infection or

contamination.



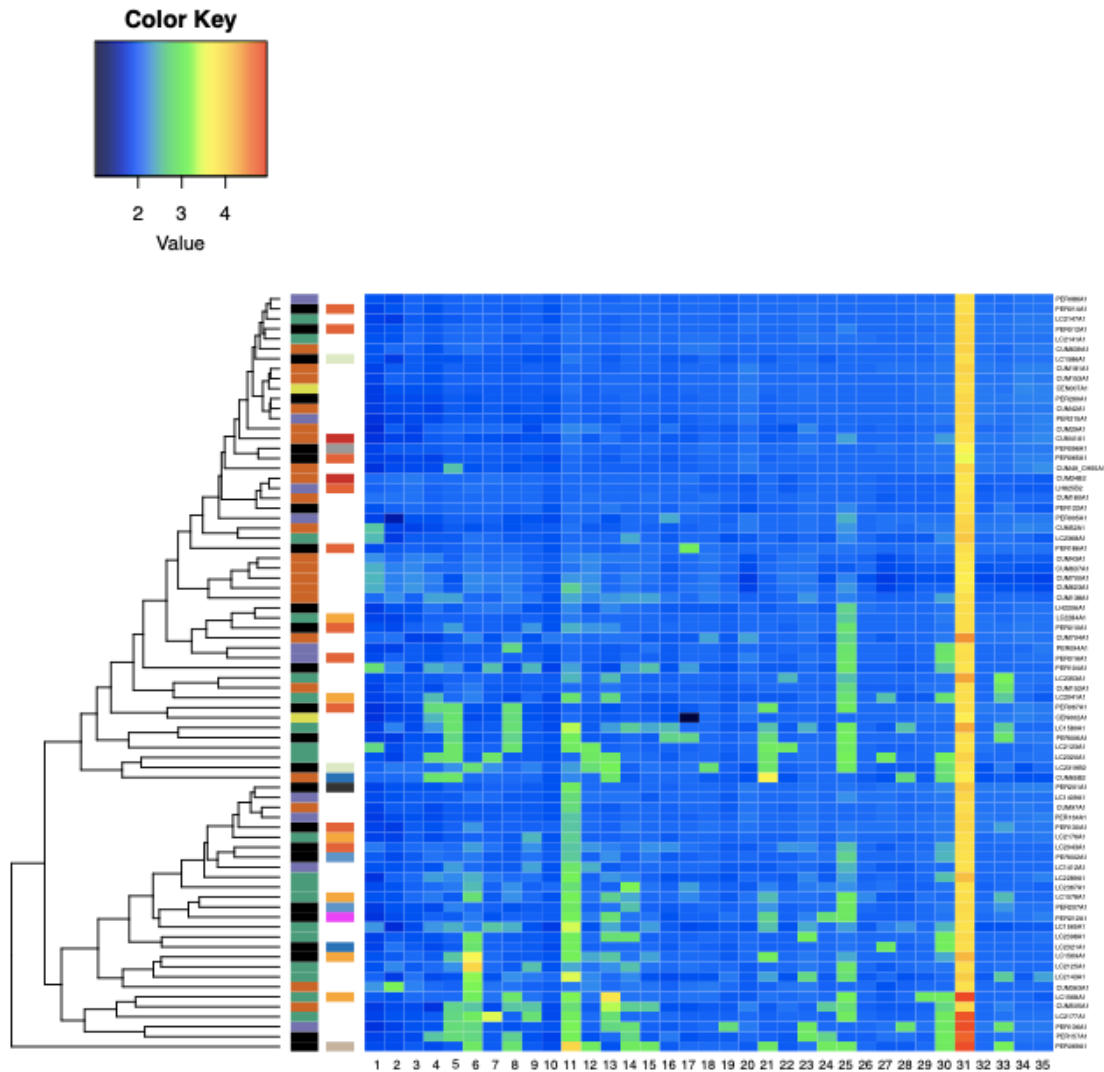

201  
202  
203  
204  
205  
206  
207  
208  
209  
210  
211  
212

**Supplementary Figure 4.** Variation in chromosome copy numbers in a panel of 76 *Lb* genomes. Isolates are clustered according to similarity in some estimation with aneuploid individuals at the bottom of the heatmap and overall diploid individuals at the top of the heatmap. Coloured boxes on the left of the heatmap represent: *Left* - the inferred *Lb* populations PAU (green), INP (orange), HUP (purple), STC (yellow-green) and ADM (black); *Right* - the identified LRV1 lineages encountered in each *Lb* isolate. I (orange), II (dark gray), III (pink), IV (steelblue), V (yellow), VI (beige), VII (dark blue), VIII (red), IX (light green), NA (light gray).

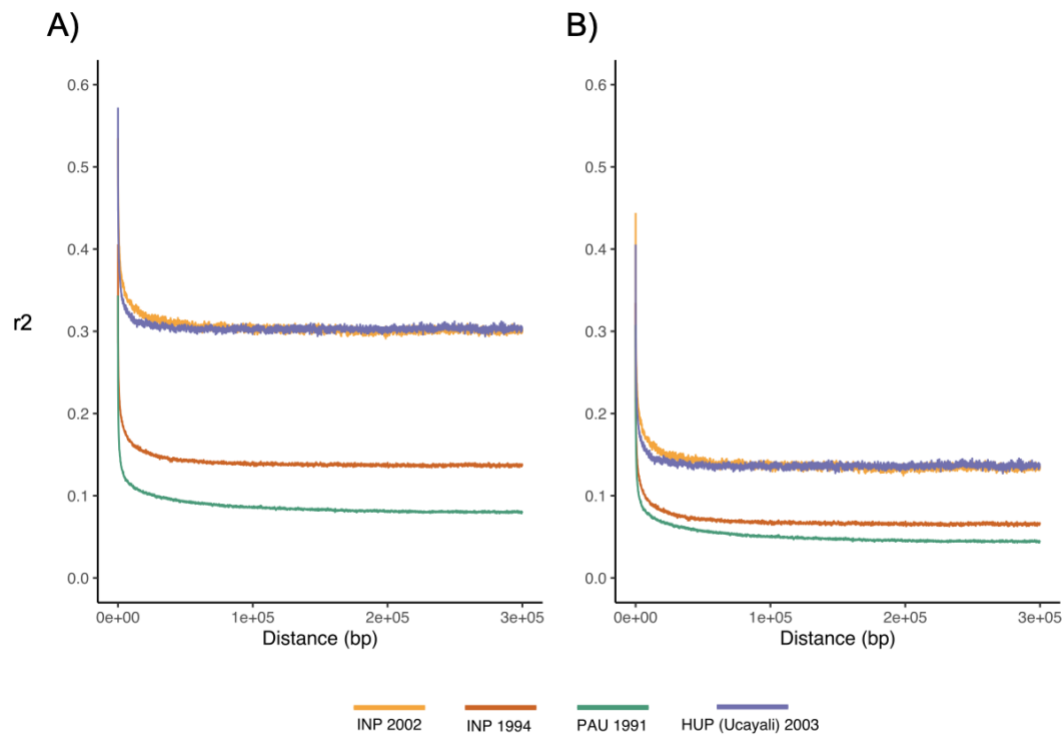

213  
214  
215  
216  
217

**Supplementary Figure 5.** Linkage Disequilibrium decay plots after correction for population structure and spatio-temporal Wahlund effects. **A)** Uncorrected for sample size. **B)** Corrected for sample size ( $r^2 - 1/(2n)$ )<sup>16</sup>.

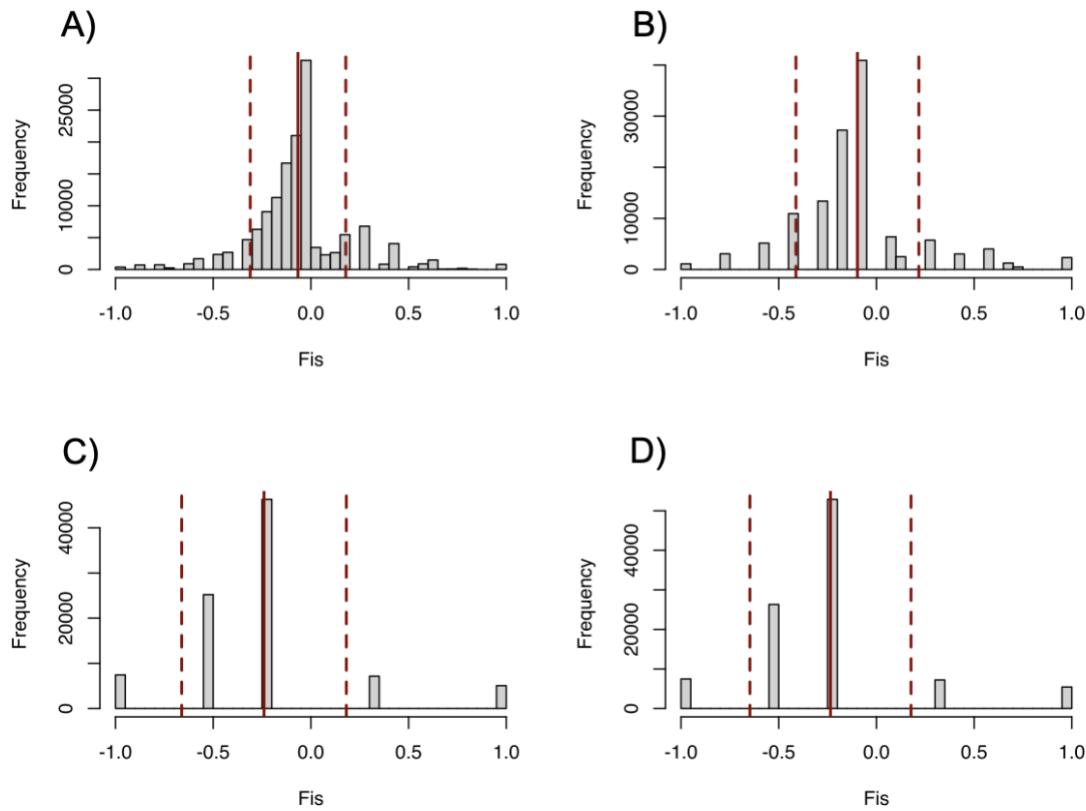

218  
219  
220  
221  
222  
223  
224  
225  
226  
227  
228  
229  
230

**Supplementary Figure 6.** Fis distributions after correction for population structure and spatio-temporal Wahlund effects. **A)** Individuals from PAU sampled in 1991 (N=14). **B)** Individuals from INP sampled in 1994 (N=7). **C)** Individuals from INP sampled in 2002 (N=3). **D)** Individuals from HUP (Ucayali) sampled in 2003 (N=3). Solid red lines depict the mean Fis value for each population. Dashed red lines represent the mean's standard deviation.

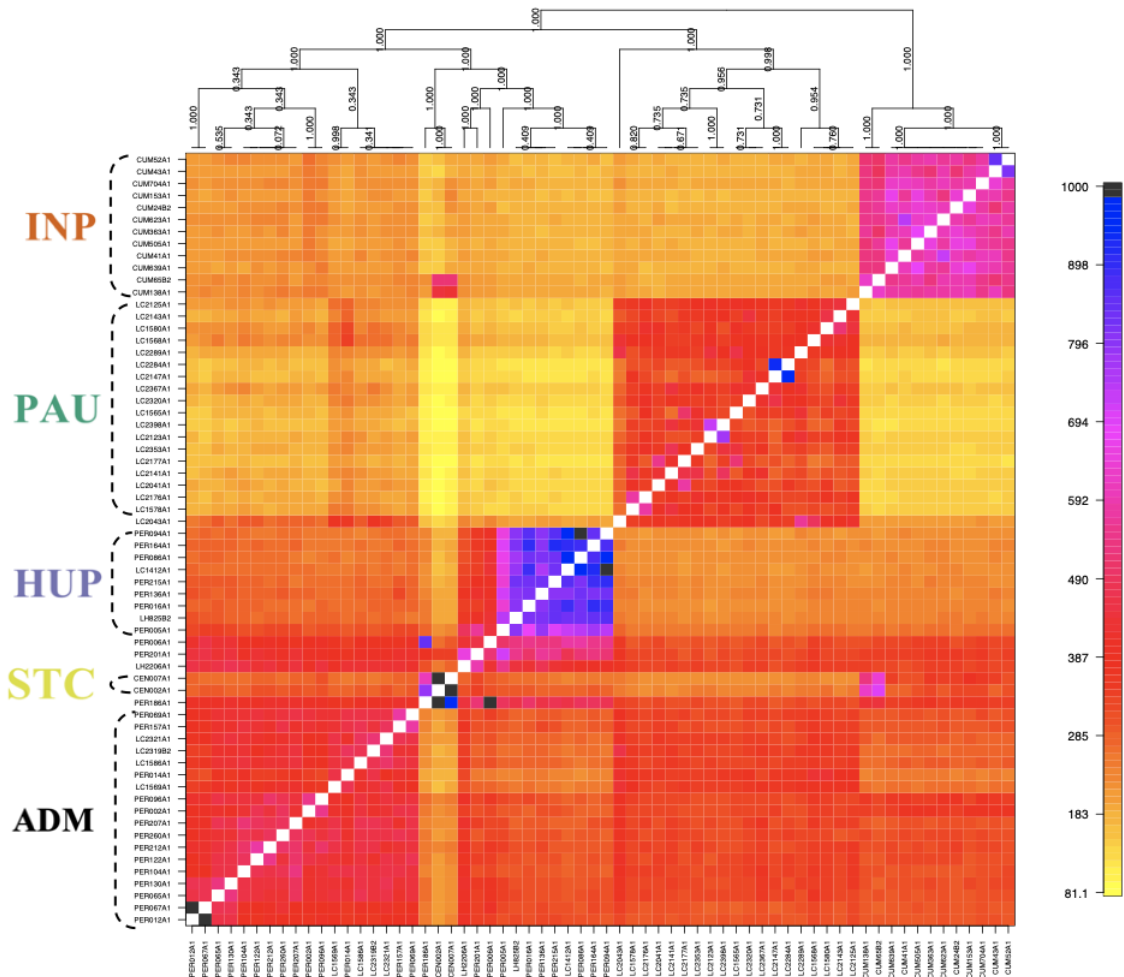

231  
232  
233  
234  
235  
236  
237  
238  
239  
240  
241  
242

**Supplementary Figure 7.** Co-ancestry matrix, as inferred by fineSTRUCTURE, depicting the pairwise number of received (rows) and donated (columns) haplotype segments between two parasite genomes. Color key on the right shows the amount of shared haplotype segments and is capped on 1000 for visibility reasons. Individuals are ordered according to the fineSTRCUTURE clustering outcome (above matrix) and dashed accolades indicate the three main parasite groups (INP, HUP, PAU) and the two main groups of admixed parasites (ADM, STC); the remainder of the parasites were of uncertain ancestry (UNC).

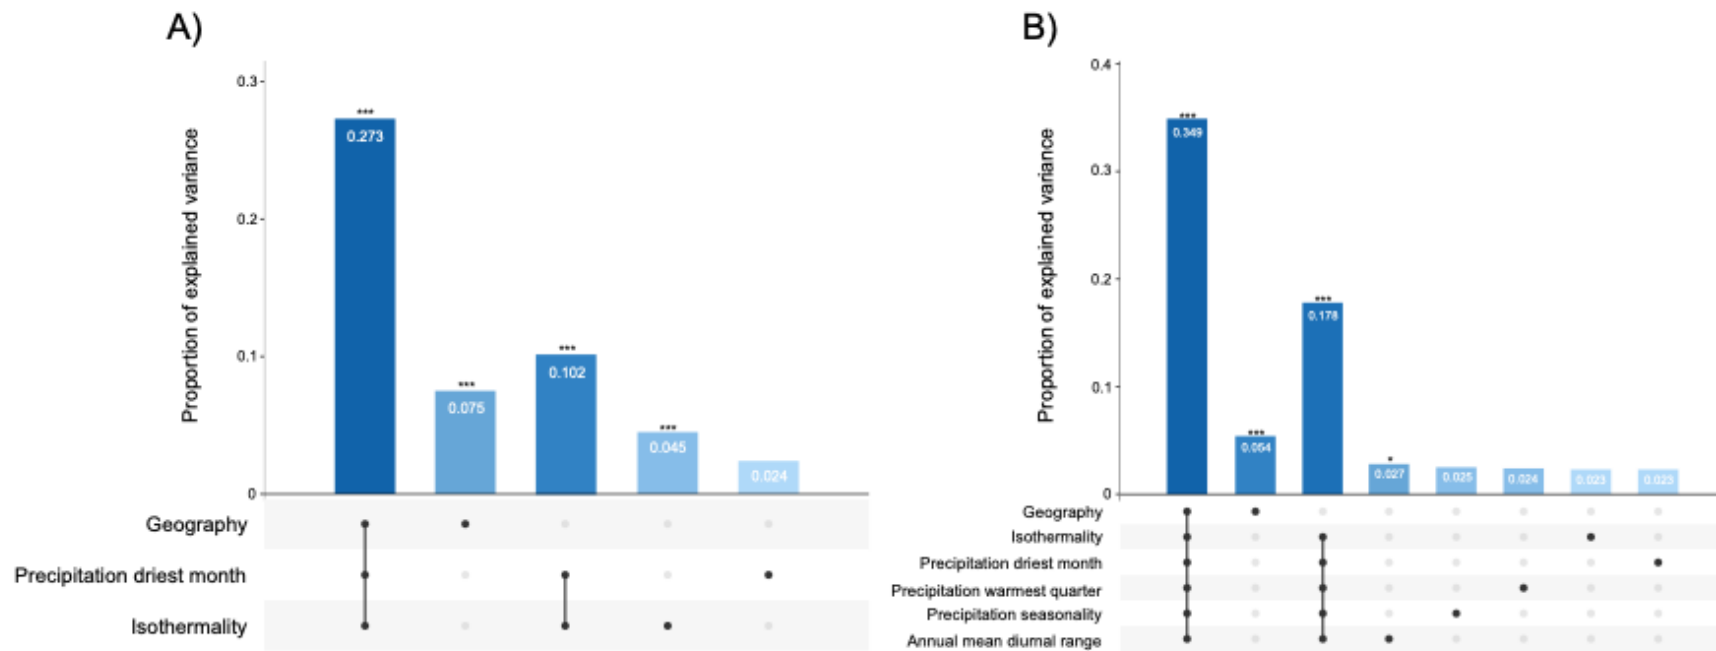

**Supplementary Figure 8:** Partial RDA models showing the influence of the environment (bioclimatic variables) and geography on the genomic variability between the three inferred populations in Peru and Bolivia. A) Partial RDA model including geography, isothermality (bio3) and precipitation of driest month (bio14). Bioclimatic variables were selected based on the automated variable selection approach (suppl. Table 6; see methods). B) Partial RDA model including geography, Isothermality (bio3), precipitation driest month (bio14), precipitation warmest quarter (bio18), precipitation seasonality (bio15) and annual mean diurnal range (bio2). Bioclimatic variables were selected based on the manual variable selection approach (suppl. 6; see methods).

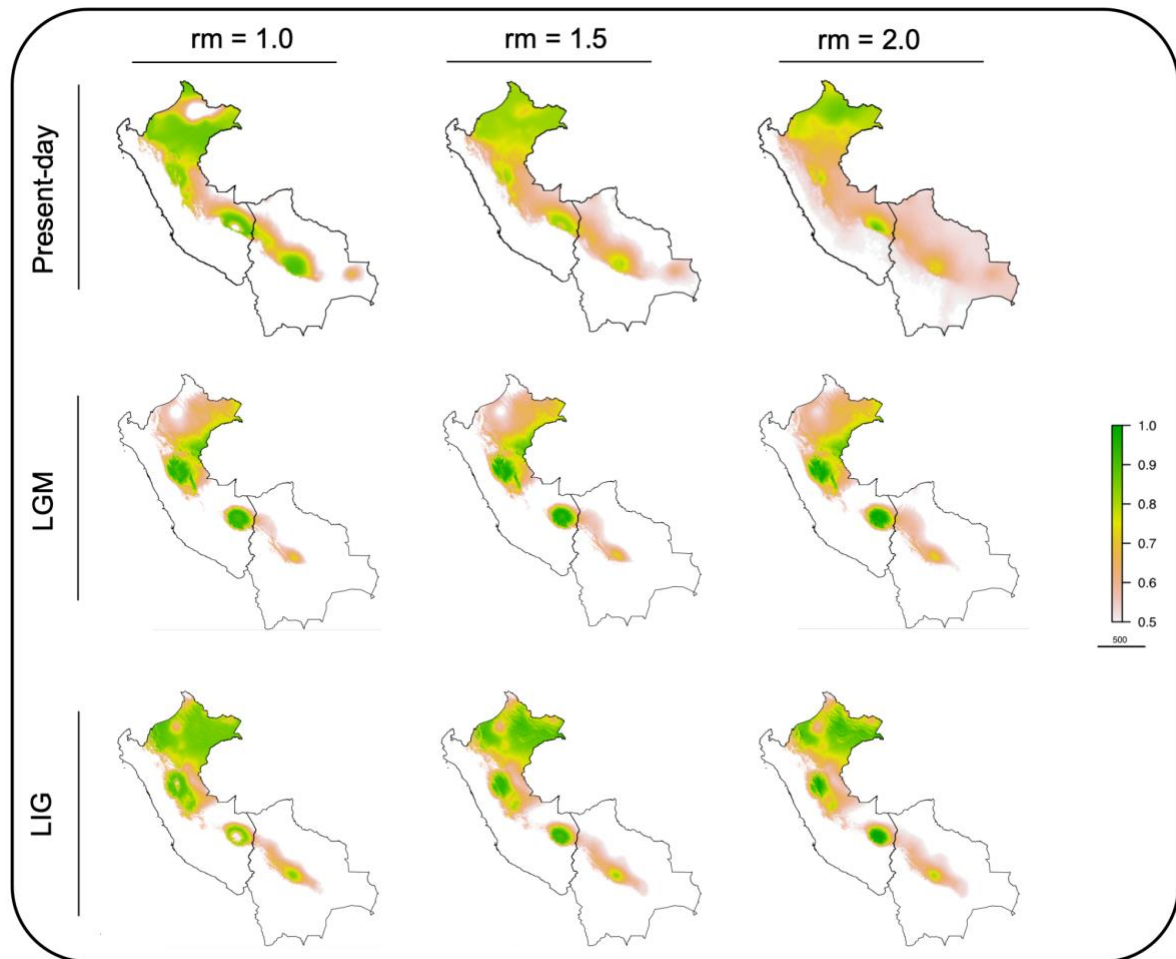

**Supplementary Figure 9.** Ecological niche models based on Present-day, LGM and LIG data of isothermality (bio3) and Precipitation of the driest month (bio14) (mod-A variable selection approach) with different regularization values ( $rm = 1, 1.5$  and  $2$ ). The continuous-scale legend represents habitat suitability (probability of occurrence).

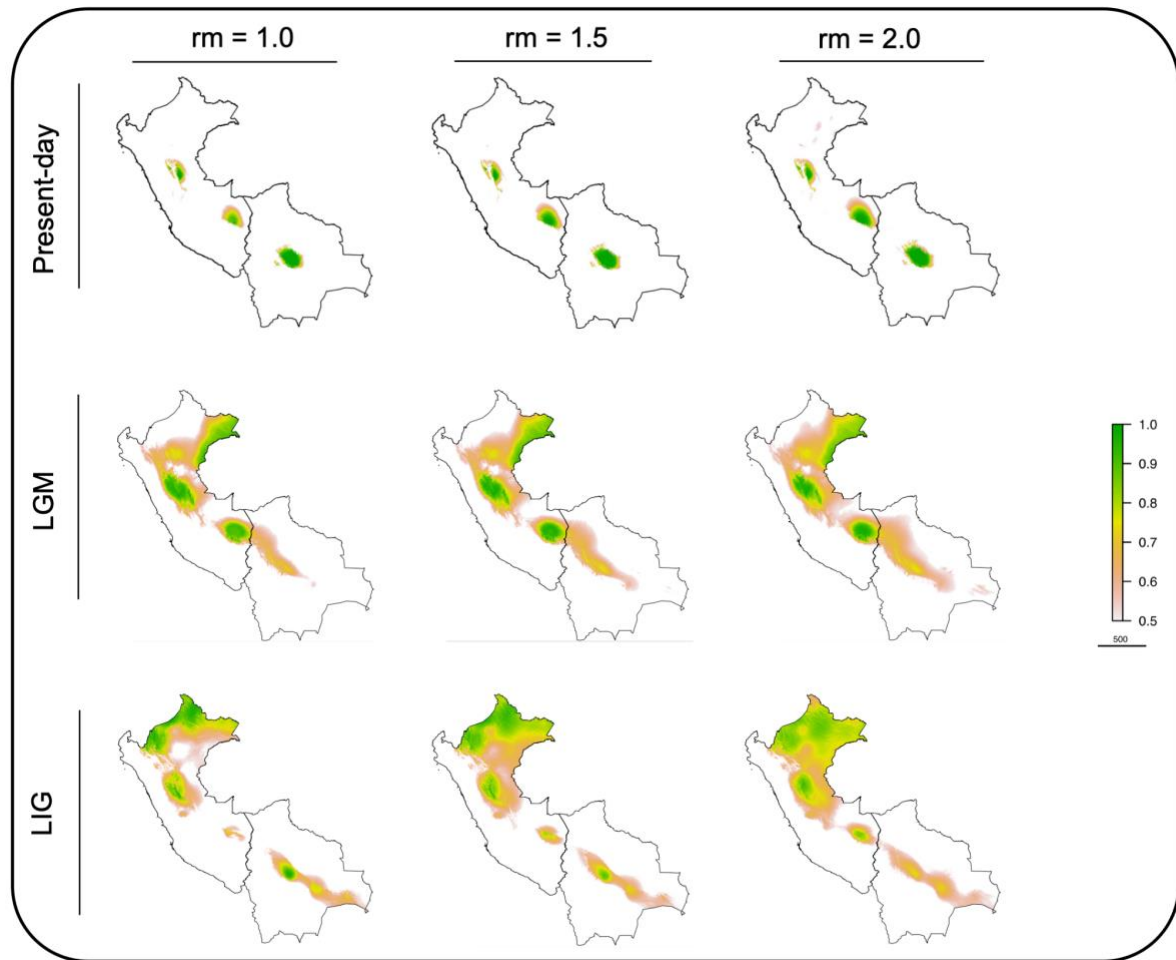

**Supplementary Figure 10.** Ecological niche models based on Present-day, LGM and LIG data of isothermality (bio3), Precipitation of the driest month (bio14), precipitation of the warmest quarter (bio18), precipitation seasonality (bio15) and annual mean diurnal range (bio2) (mod-M variable selection approach) with different regularization values ( $rm = 1, 1.5$  and  $2$ ). The continuous-scale legend represents habitat suitability (probability of occurrence).





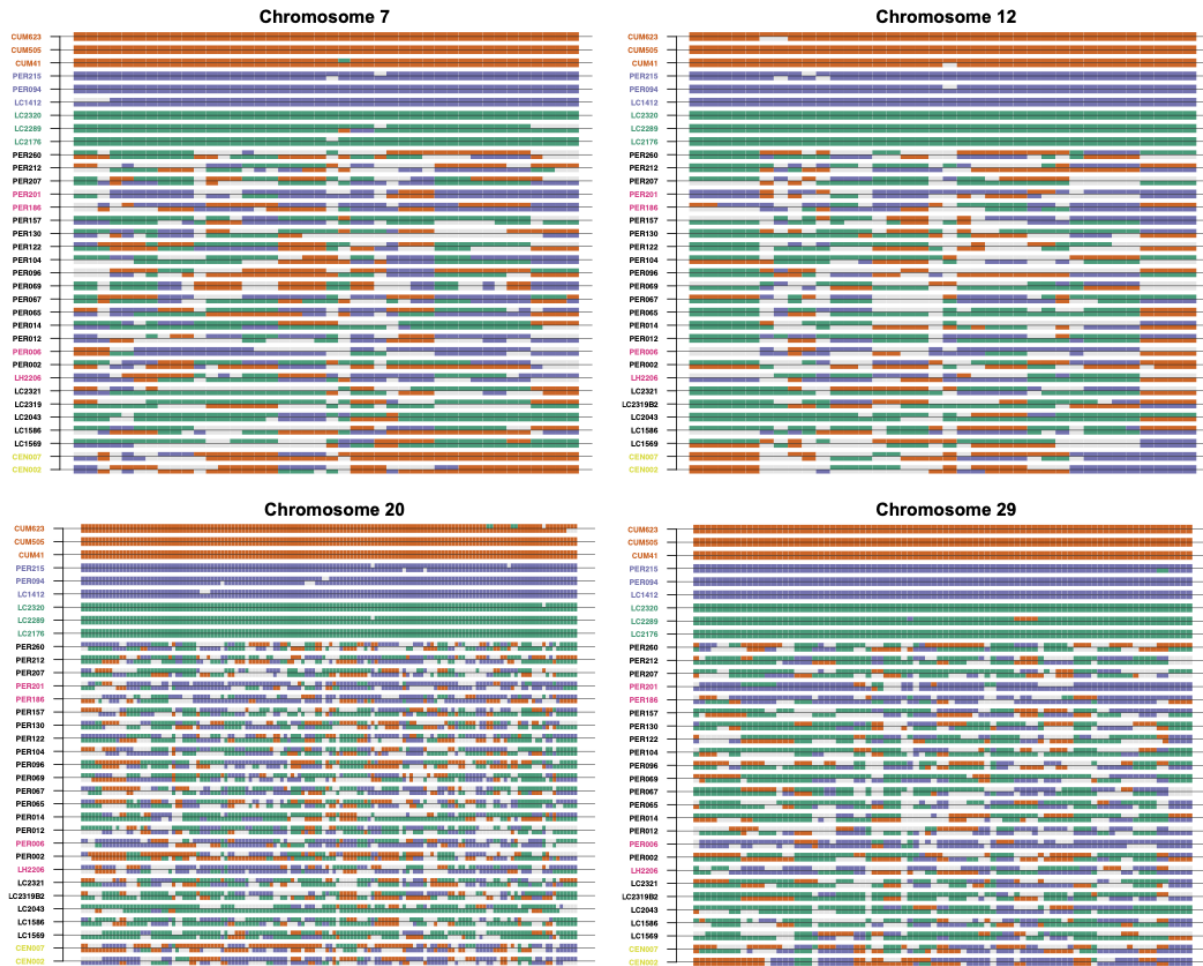

**Supplementary Figure 12.** PCAdmix local ancestry assignment to PAU, INP and HUP source populations of the 19 ADM isolates, 4 UNC isolates, 2 STC isolates and three randomly selected isolates from each source population. Ancestry was assigned in windows of 30 SNPs along each chromosome (here only chromosomes 7, 12, 20 and 29 are shown).

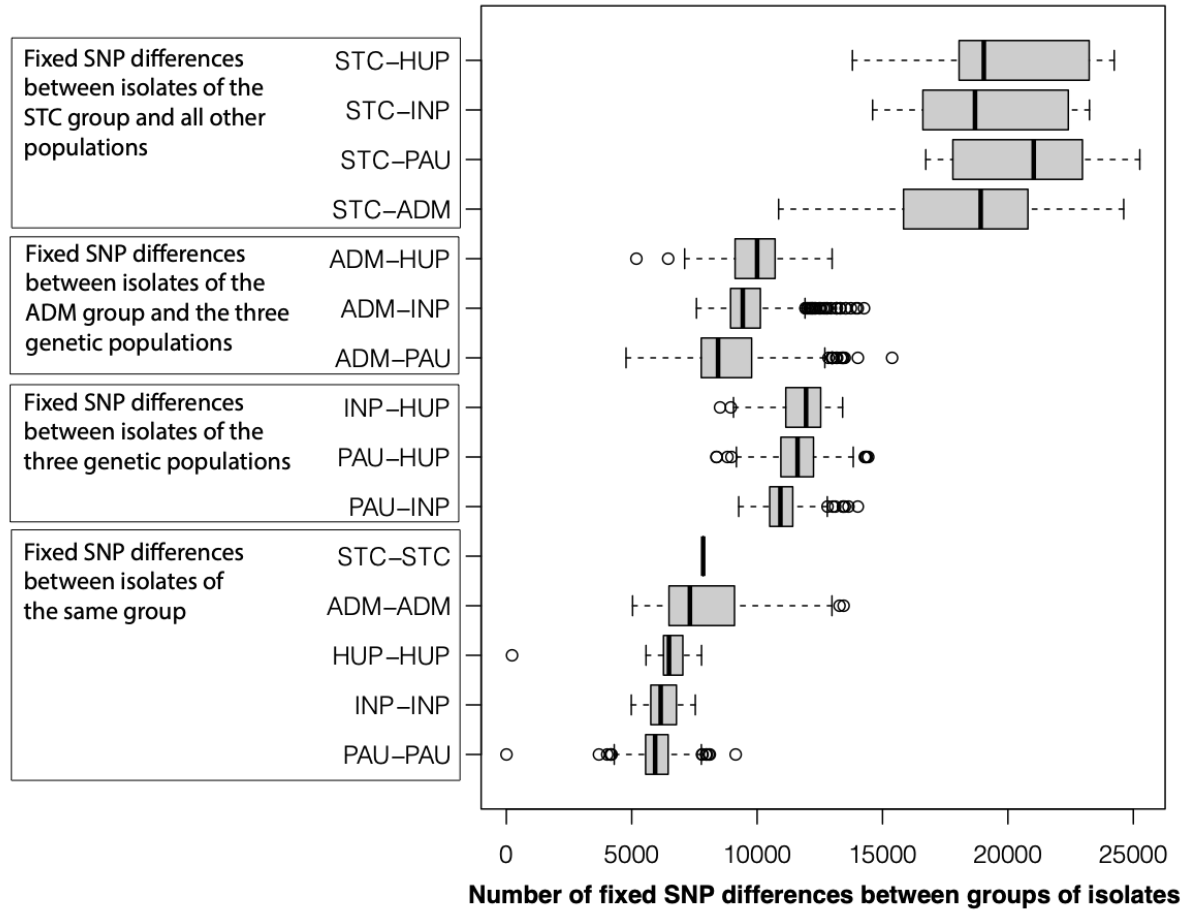

**Supplementary Figure 13.** Number of fixed SNP differences between *Lb* isolates of the same group or between *Lb* isolates of different groups.

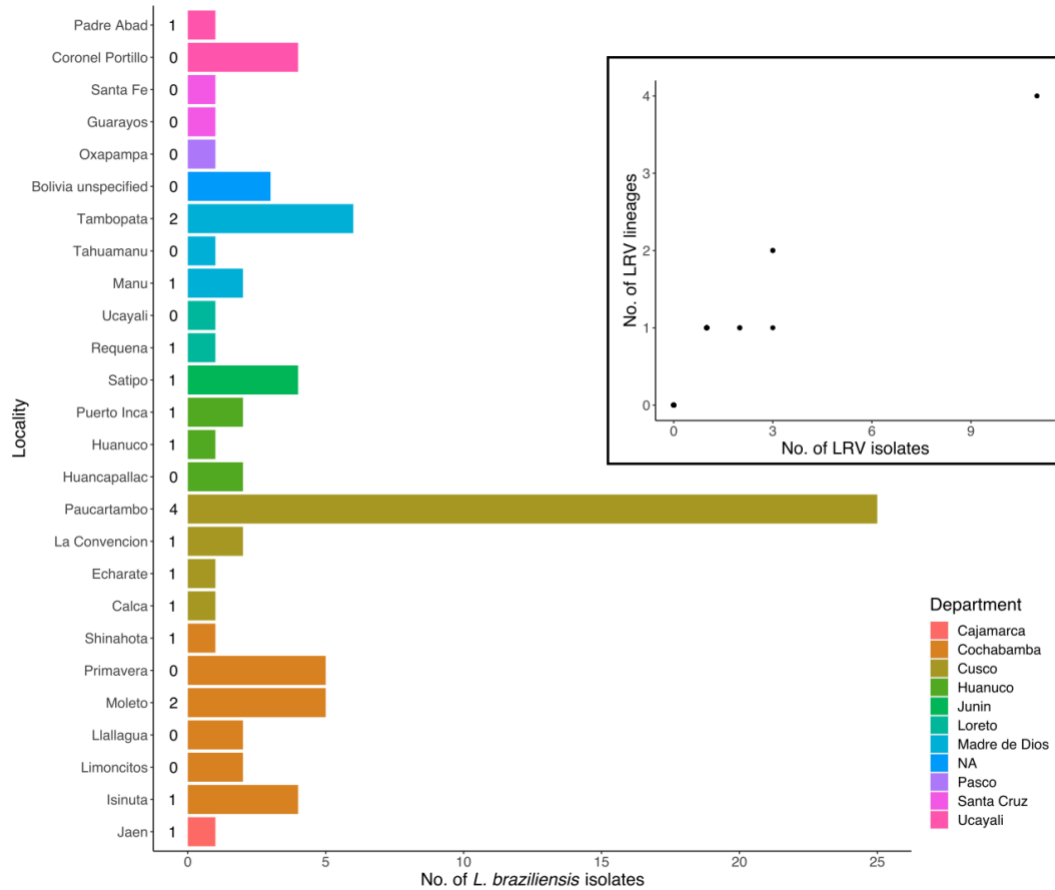

**Supplementary Figure 14.** Barplot shows the number of *Lb* isolates per sampling locality. Number on the right of each bar shows the number of *Lb* isolates that were positive for LRV1. Bars are coloured according to the Department. Inset reveals the number of LRV1 lineages versus the number of LRV1 isolates that were recovered in a given locality.

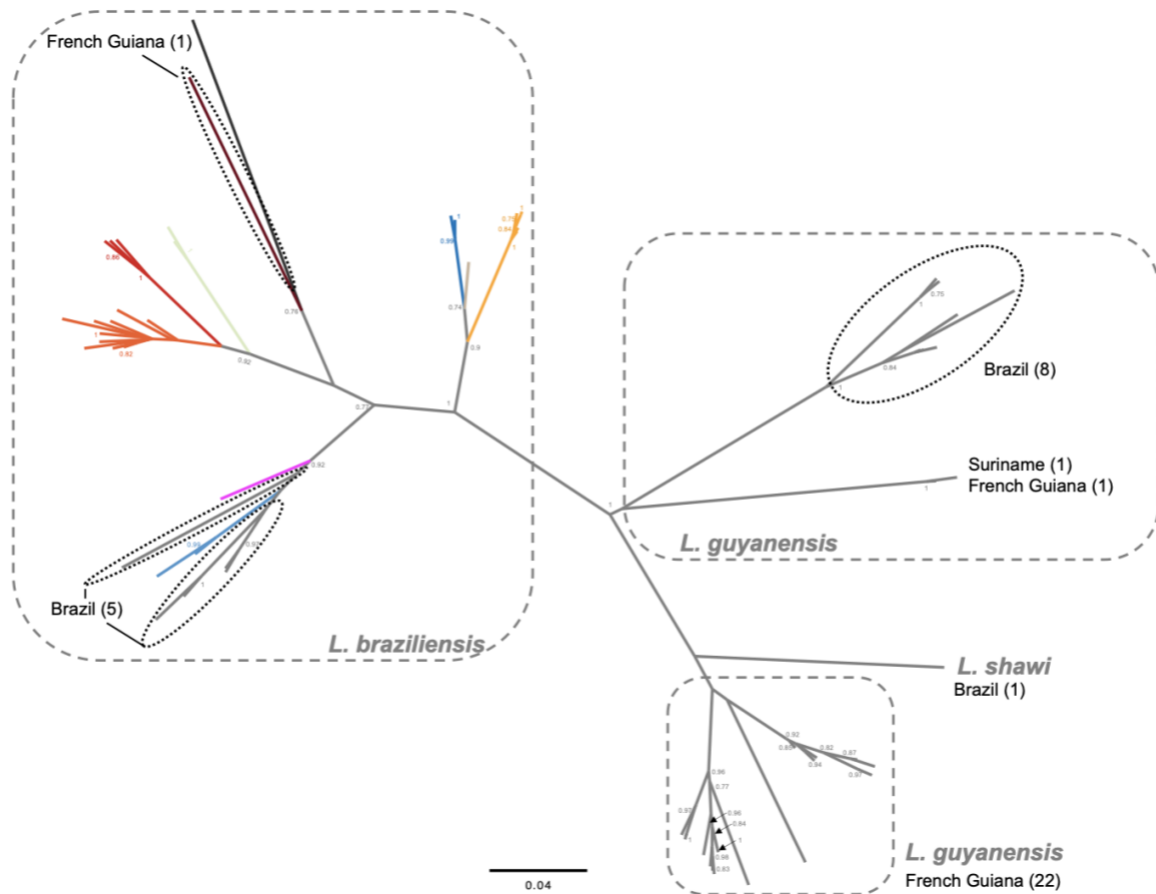

**Supplementary Figure 15.** Maximum likelihood tree based on partial LRV1 sequences (756bp) from *L. braziliensis*, *L. guyanensis* and *L. shawi* originating from Peru, Bolivia, Brazil, French Guiana and Suriname<sup>17–20</sup>. Colored lineages in *L. braziliensis* correspond to the LRV1 lineages described in this study (Fig. 3).

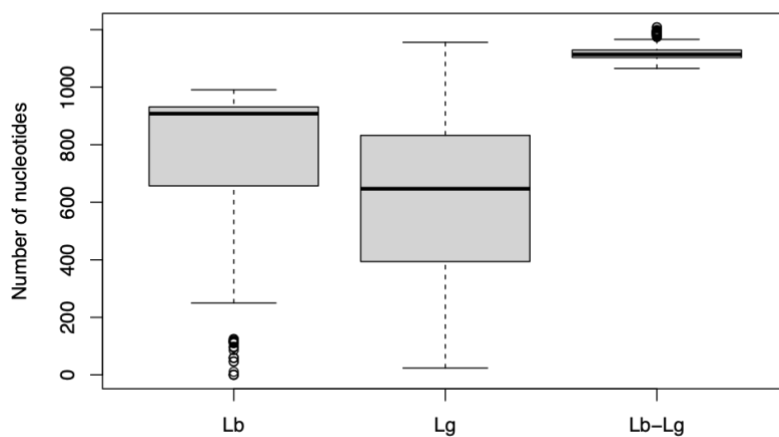

**Supplementary Figure 16.** Nucleotide differences - on average higher between *Lb* and *Lg* viral genomes than within *Lb* and *Lg*.

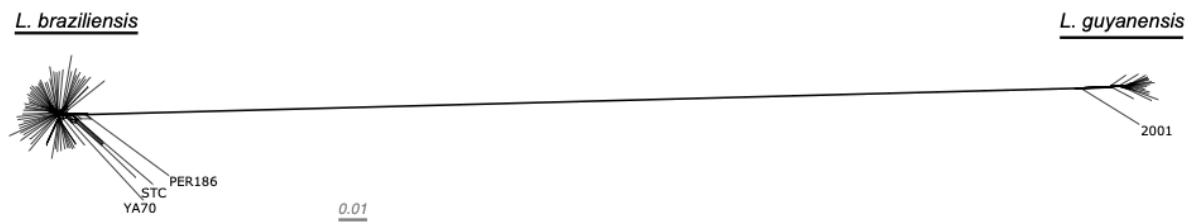

**Supplementary Figure 17.** A phylogenetic network, inferred with SPLITSTREE, based on uncorrected p-distances between 77 *Lb* and 19 *Lg* isolates typed at 7,571 bi-allelic SNPs.

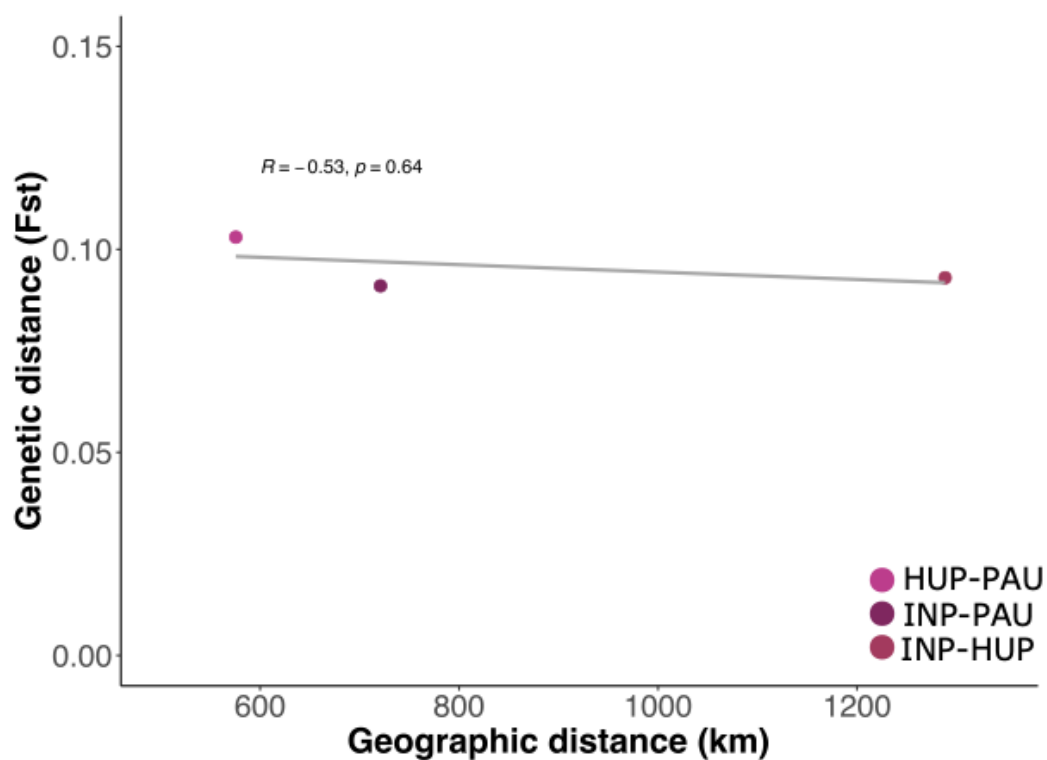

**Supplementary Figure 18.** Linear regression of the interdeme great-circle distance (km) and the Weir & Cockerham's  $F_{st}$  of the three ancestral *L. braziliensis* components.

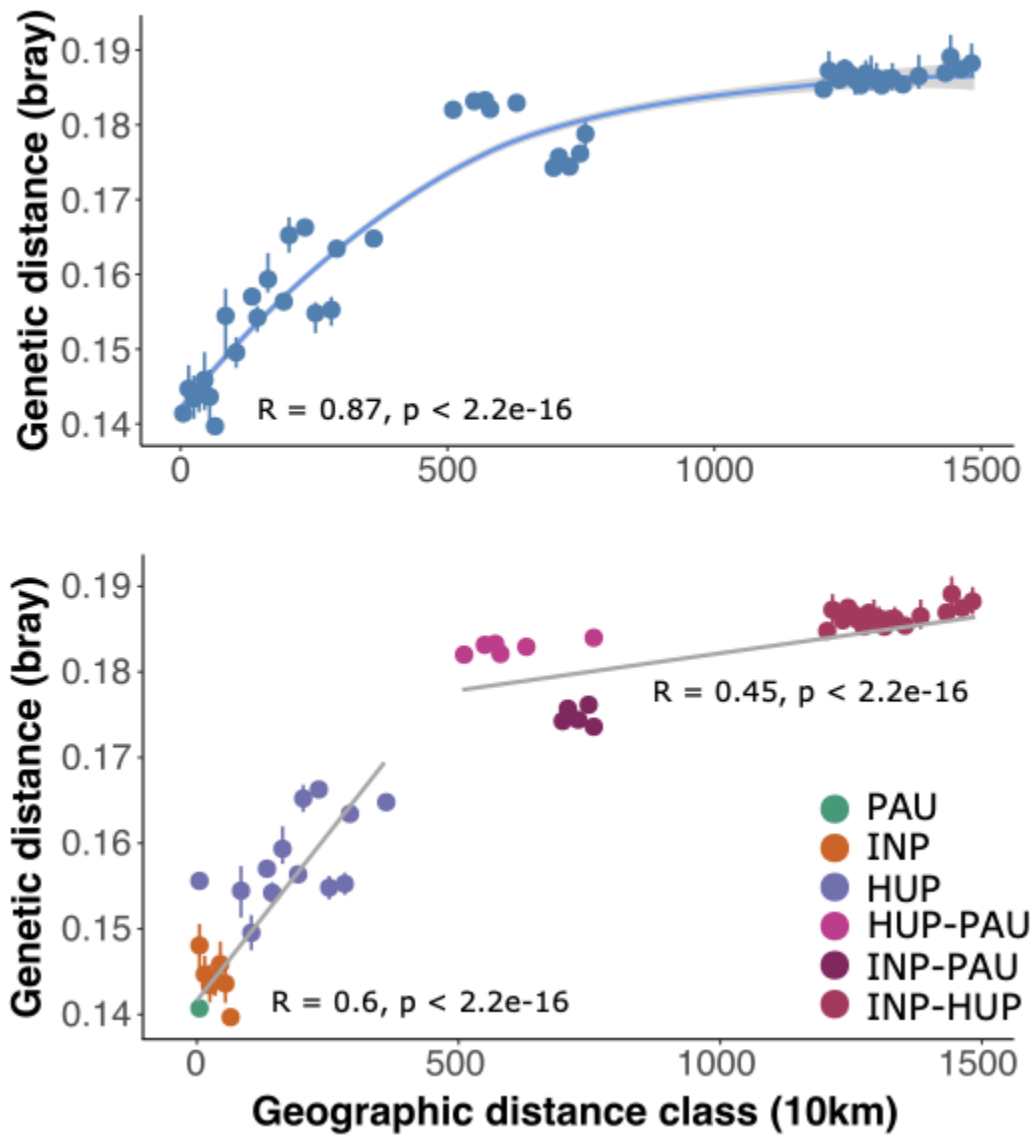

**Supplementary Figure 19.** Regressions of the inter-individual great-circle distance (km) and pairwise genetic distance (Bray-Curtis dissimilarity of SNP genotypes) revealing a case-IV IBD pattern. a) Loess regression for all individuals with a loess value of 1.2. b) Linear regression of intra- and inter-population genetic distance vs. geographic distance, separately.

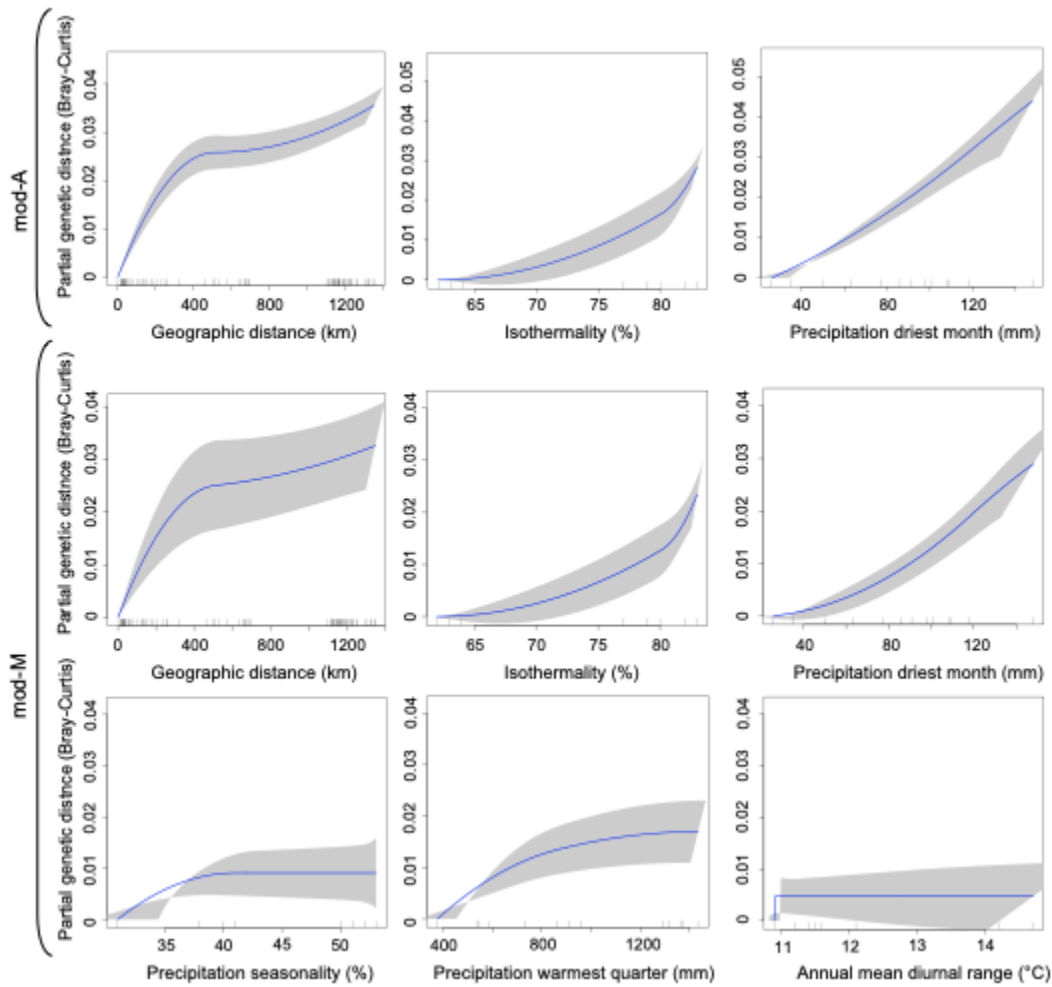

**Supplementary Figure 20.** I-spline response curves for each variable included in the different generalized dissimilarity models (mod-A & mod-M). The maximum curve height represents the amount of genetic variability the variable explains (i.e. the variable importance). The curves' slope indicates the degree of the explained genomic dissimilarity along the spatial or environmental gradient, meaning a steeper slope represents greater dissimilarity between two points while a shallower slope suggests less variability among the two points.
